# Supplementary material for: Catalytic and non-catalytic roles of pendant groups in the decomposition of N@C60: a DFT investigation
Source: Royal Society of Chemistry journal article supplement (doi:10.1039/c2cc30375b), 2012-01-01
Supplement: c2cc30375b.pdf [file c2cc30375b.pdf]

## Supporting information for:

### Catalytic and non-catalytic roles of derivative groups in the decomposition of N@C<sub>60</sub>: a DFT investigation†

Guoquan Liu,<sup>a</sup> Andrei N. Khlobystov,<sup>b</sup> G. Andrew D. Briggs<sup>a</sup> and Kyriakos Porfyrakis<sup>\*a</sup>

#### Computational details

Hybrid DFT calculations were carried out with the Gaussian03 programme<sup>1</sup> at the spin-unrestricted B3LYP level<sup>2,3</sup>. Split-valence 6-31G basis set was used for all elements with additional *p* polarization functional applied to N. Stationary points have been optimized using the Berny optimization algorithm with GDIIS step<sup>4</sup>. Analytical frequency calculations were further carried out to verify the nature of these minima. Transition states were obtained using the Berny optimization algorithm with Rational Function Optimization (RFO) step<sup>5</sup> and verified by frequency calculations. Thermal energy calculation was performed with temperature and pressure set to be 298.15 K and 1 atm, respectively. Molecular structure and spin density distribution are visualized using GaussView<sup>6</sup>. All calculations were set to be in the gas phase.

**Figure S1** Optimized geometry (a, b) and spin density distribution (c) of the transition state **TS1b** in the decomposition of  $N@C_{60}$ . The displacement vectors are shown in (b).

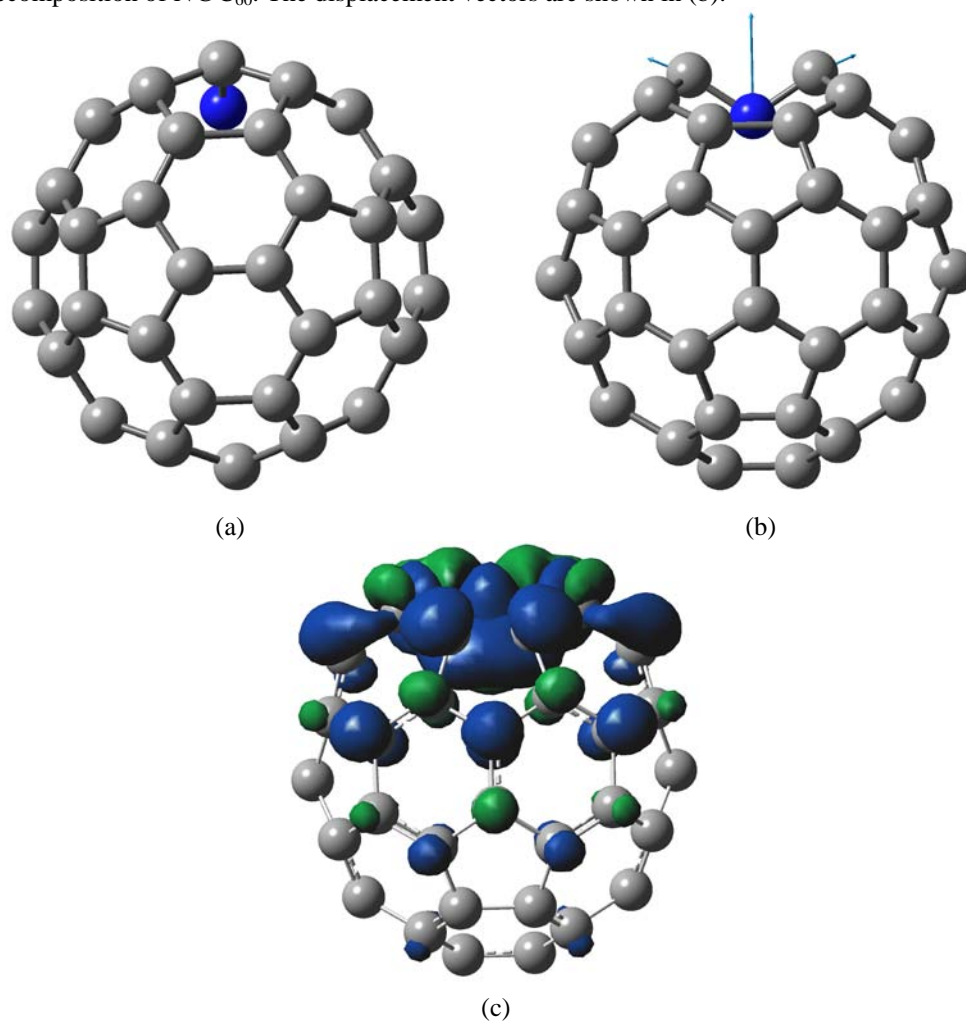

**Figure S2** Decomposition pathway for pristine  $N@C_{60}$  through coordination of four carbon atoms. Proposed by Tsetseris <sup>7</sup>, recalculated at the B3LYP/6-31G level.

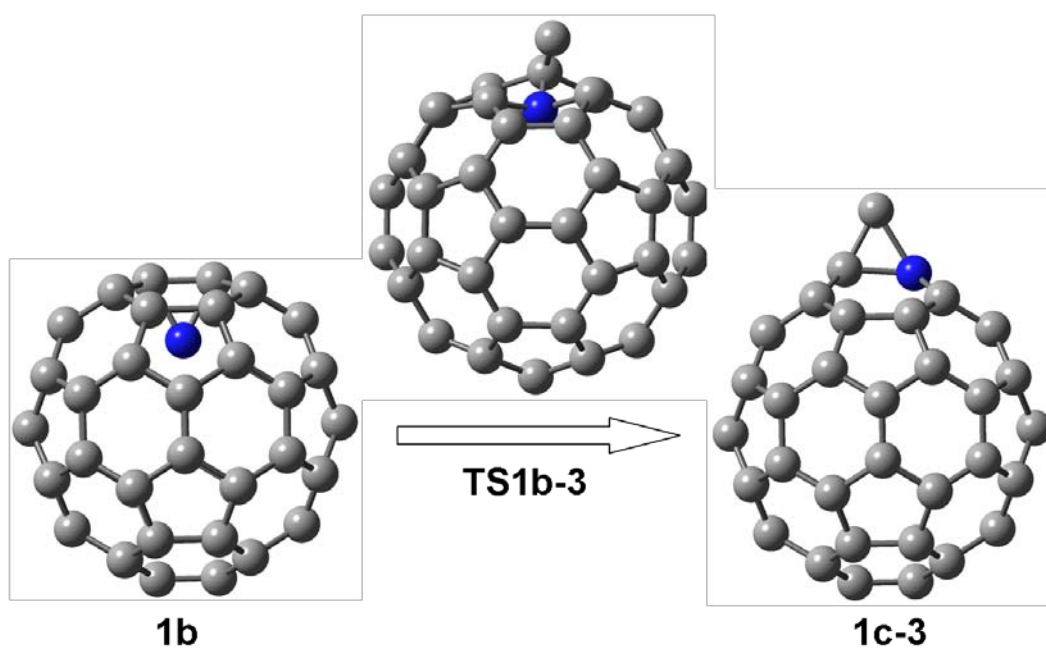

**Figure S3** Optimized geometry (a, b) and spin density distribution (c) of the transition state **TS2b** in the decomposition of the pyrrolidine derivative of  $N@C_{60}$ . The displacement vectors are shown in (a).

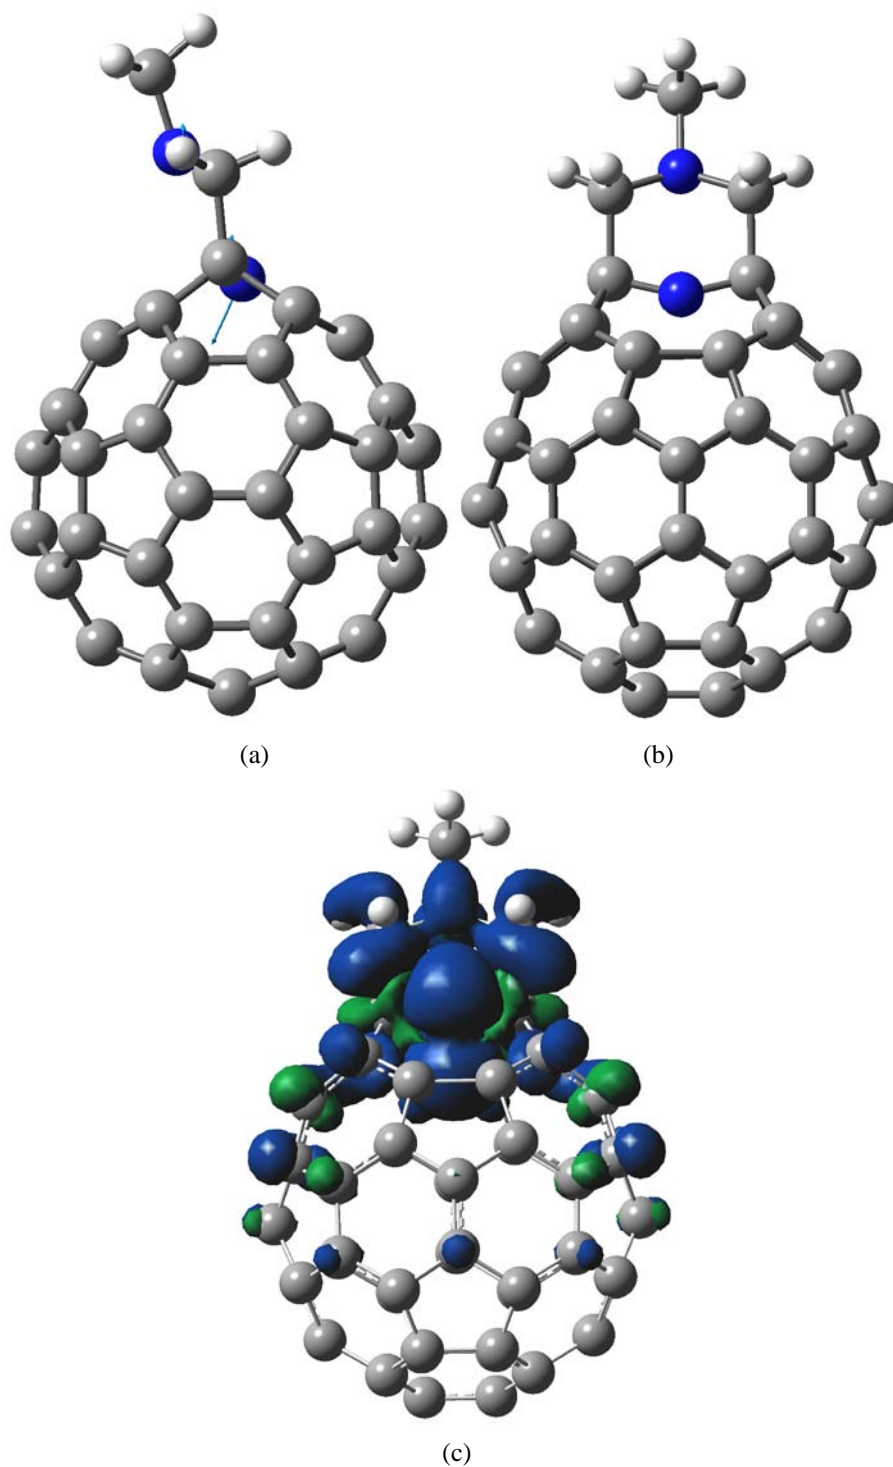

**Table S1** The  $\langle S^2 \rangle$  value of the ground state of all the optimized structures.

|                       | <b>1a</b> | <b>1b</b> | <b>TS1b</b> | <b>1c</b> | <b>2a</b> | <b>2b</b> | <b>TS2b</b> | <b>2c</b> | <b>3a</b> | <b>3b</b> |
|-----------------------|-----------|-----------|-------------|-----------|-----------|-----------|-------------|-----------|-----------|-----------|
| S                     | 3/2       | 1/2       | 1/2         | 1/2       | 3/2       | 1/2       | 1/2         | 1/2       | 3/2       | 1/2       |
| $\langle S^2 \rangle$ | 3.7525    | 0.7598    | 0.7566      | 0.7541    | 3.7525    | 0.7591    | 0.7581      | 0.7542    | 3.7525    | 0.7591    |

## References

- (1) Frisch, M. J.; Trucks, G. W.; Schlegel, H. B.; Scuseria, G. E.; Robb, M. A.; Cheeseman, J. R.; Montgomery, J., J. A.; Vreven, T.; Kudin, K. N.; Burant, J. C.; Millam, J. M.; Iyengar, S. S.; Tomasi, J.; Barone, V.; Mennucci, B.; Cossi, M.; Scalmani, G.; Rega, N.; Petersson, G. A.; Nakatsuji, H.; Hada, M.; Ehara, M.; Toyota, K.; Fukuda, R.; Hasegawa, J.; Ishida, M.; Nakajima, T.; Honda, Y.; Kitao, O.; Nakai, H.; Klene, M.; Li, X.; Knox, J. E.; Hratchian, H. P.; Cross, J. B.; Bakken, V.; Adamo, C.; Jaramillo, J.; Gomperts, R.; Stratmann, R. E.; Yazyev, O.; Austin, A. J.; Cammi, R.; Pomelli, C.; Ochterski, J. W.; Ayala, P. Y.; Morokuma, K.; Voth, G. A.; Salvador, P.; Dannenberg, J. J.; Zakrzewski, V. G.; Dapprich, S.; Daniels, A. D.; Strain, M. C.; Farkas, O.; Malick, D. K.; Rabuck, A. D.; Raghavachari, K.; Foresman, J. B.; Ortiz, J. V.; Cui, Q.; Baboul, A. G.; Clifford, S.; Cioslowski, J.; Stefanov, B. B.; Liu, G.; Liashenko, A.; Piskorz, P.; Komaromi, I.; Martin, R. L.; Fox, D. J.; Keith, T.; Al-Laham, M. A.; Peng, C. Y.; Nanayakkara, A.; Challacombe, M.; Gill, P. M. W.; Johnson, B.; Chen, W.; Wong, M. W.; Gonzalez, C.; Pople, J. A.; Gaussian, Inc.: Wallingford CT, 2004.
- (2) Becke, A. D. *J. Chem. Phys.* **1993**, *98*, 5648.
- (3) Stephens, P. J.; Devlin, F. J.; Chabalowski, C. F.; Frisch, M. J. *J. Phys. Chem.* **1994**, *98*, 11623.
- (4) Csaszar, P.; Pulay, P. *J. Mol. Struct.* **1984**, *114*, 31.
- (5) Simons, J.; Jorgensen, P.; Taylor, H.; Ozment, J. *J. Phys. Chem.* **1983**, *87*, 2745.
- (6) Dennington, R.; Keith, T.; Millam, J.; Version 5 ed.; Semichem Inc.: Shawnee Mission KS, 2009.
- (7) Tsetseris, L. *J. Phys. Chem. C* **2011**, *115*, 3528.

## Cartesian coordinates and energy of the optimized structures.

1a

Sum of electronic and zero-point Energies= -2339.790851  
Sum of electronic and thermal Energies= -2339.768303  
Sum of electronic and thermal Enthalpies= -2339.767359  
Sum of electronic and thermal Free Energies= -2339.838866

|   |             |             |             |
|---|-------------|-------------|-------------|
| C | 0.33819900  | -3.30298000 | -1.28920500 |
| C | -0.39914700 | -2.63829700 | -2.35924600 |
| C | -1.72613000 | -2.24880200 | -2.15624900 |
| C | -2.37445300 | -2.50672500 | -0.87423200 |
| C | -1.66831100 | -3.14320500 | 0.15047200  |
| C | -0.28266800 | -3.54994900 | -0.06149200 |
| C | 0.52366400  | -1.74922100 | -3.05809400 |
| C | -2.18898200 | -0.95298300 | -2.64312500 |
| C | -3.23802400 | -1.37033600 | -0.56878400 |
| C | -1.79457000 | -2.67150700 | 1.52595400  |
| C | 0.44748600  | -3.32961300 | 1.18300200  |
| C | 1.71669400  | -2.82466300 | -1.32672900 |
| C | -2.62156700 | -1.58325200 | 1.81846100  |
| C | -3.35893700 | -0.91859500 | 0.74843300  |
| C | -2.17746700 | -0.56202800 | 2.76199900  |
| C | -3.37053400 | 0.51342000  | 1.03067100  |
| C | 0.08040900  | -0.50829400 | -3.52432700 |
| C | -3.12340000 | -0.41006300 | -1.66203600 |
| C | -2.64034500 | 0.73377100  | 2.27513700  |
| C | -3.13451500 | 0.96128700  | -1.39174000 |
| C | -1.30525000 | -0.10156300 | -3.31234800 |
| C | -0.48692400 | -2.78670100 | 2.16409300  |
| C | 1.76759400  | -2.87158000 | 1.14704100  |
| C | 0.92520400  | 0.67232700  | -3.37306100 |
| C | 2.41592300  | -2.61363700 | -0.13496800 |
| C | 1.83130700  | -1.86437000 | -2.41992600 |
| C | 2.21169000  | -1.85036200 | 2.09061100  |
| C | 3.26074700  | -1.43302100 | 0.01627500  |
| C | 2.64035600  | -0.73377400 | -2.27512800 |
| C | -3.26074200 | 1.43302000  | -0.01626400 |
| C | -0.06164100 | -1.80870400 | 3.06765000  |
| C | -1.31684200 | 1.33041800  | -3.03009900 |
| C | 3.13452600  | -0.96128700 | 1.39175400  |
| C | 3.37054000  | -0.51342000 | -1.03065800 |
| C | 2.17746900  | 0.56202600  | -2.76198200 |
| C | 2.62157900  | 1.58325100  | -1.81845100 |
| C | 0.06164800  | 1.80870300  | -3.06763800 |
| C | -2.21167900 | 1.85036400  | -2.09059700 |
| C | -1.76758700 | 2.87158400  | -1.14702800 |
| C | 3.35894400  | 0.91859300  | -0.74842000 |
| C | 3.23803200  | 1.37033800  | 0.56879600  |
| C | 2.37446500  | 2.50672900  | 0.87424600  |
| C | 3.12341000  | 0.41006300  | 1.66204800  |
| C | -0.92519600 | -0.67232700 | 3.37306800  |
| C | -0.44747900 | 3.32961700  | -1.18299000 |
| C | 1.31685000  | -1.33041800 | 3.03011300  |
| C | 1.30525900  | 0.10156400  | 3.31236100  |
| C | 0.48693200  | 2.78670000  | -2.16407900 |
| C | -2.41591700 | 2.61363800  | 0.13497900  |
| C | -1.71668600 | 2.82466300  | 1.32673900  |
| C | 1.79457700  | 2.67150400  | -1.52594100 |
| C | 1.66831800  | 3.14320200  | -0.15045900 |
| C | 2.18899300  | 0.95298200  | 2.64313900  |
| C | 1.72614000  | 2.24880100  | 2.15626100  |
| C | 0.28267600  | 3.54995500  | 0.06150400  |
| C | -0.08040100 | 0.50829300  | 3.52433500  |
| C | -1.83129700 | 1.86436800  | 2.41993300  |
| C | -0.33819100 | 3.30297700  | 1.28921400  |
| C | -0.52365400 | 1.74921700  | 3.05809800  |
| C | 0.39915600  | 2.63829500  | 2.35925600  |
| N | -0.00021700 | 0.00000600  | -0.00029900 |

1b

Sum of electronic and zero-point Energies= -2339.724863  
Sum of electronic and thermal Energies= -2339.703799  
Sum of electronic and thermal Enthalpies= -2339.702855  
Sum of electronic and thermal Free Energies= -2339.768835

|   |             |             |             |
|---|-------------|-------------|-------------|
| C | -2.32940300 | -0.69870600 | 2.60817800  |
| C | -2.31584500 | 0.75764800  | 2.60253100  |
| C | -1.18146400 | 1.45358200  | 3.03125000  |
| C | 0.00000300  | 0.71990600  | 3.47704300  |
| C | 0.00000300  | -0.67482200 | 3.48949400  |
| C | -1.19108600 | -1.40842500 | 3.05528400  |
| C | -3.04792800 | 1.21882300  | 1.42657600  |
| C | -0.73065700 | 2.63317300  | 2.30799600  |
| C | 1.18146900  | 1.45358300  | 3.03124800  |
| C | 1.19109200  | -1.40842400 | 3.05528200  |
| C | -0.76402500 | -2.59303300 | 2.35515000  |
| C | -3.07228800 | -1.13989100 | 1.43974000  |
| C | 2.32940800  | -0.69870500 | 2.60817400  |
| C | 2.31584900  | 0.75764900  | 2.60252700  |
| C | 3.07229100  | -1.13988900 | 1.43973500  |
| C | 3.04793000  | 1.21882400  | 1.42657000  |
| C | -2.61098500 | 2.34833100  | 0.72920400  |
| C | 0.73066000  | 2.63317400  | 2.30799400  |
| C | 3.51044100  | 0.04426300  | 0.69828800  |
| C | 1.42893900  | 3.07348200  | 1.17914300  |
| C | -1.42893800 | 3.07348100  | 1.17914500  |
| C | 0.76403100  | -2.59303300 | 2.35514900  |
| C | -1.51063700 | -3.00735600 | 1.24190800  |
| C | -2.61098800 | 2.34811900  | -0.72988900 |
| C | -2.67059400 | -2.29188100 | 0.74441500  |
| C | -3.51044000 | 0.04426100  | 0.69829400  |
| C | -0.72582900 | -3.24300500 | 0.00047300  |
| C | -2.67059700 | -2.29210000 | -0.74373700 |
| C | -3.51044000 | 0.04405700  | -0.69829800 |
| C | 2.61098500  | 2.34833300  | 0.72919900  |
| C | 1.51064100  | -3.00735500 | 1.24190500  |
| C | -0.69919000 | 3.52471400  | -0.00051700 |
| C | -1.51064400 | -3.00772500 | -1.24102900 |
| C | -3.07229200 | -1.14031200 | -1.43939800 |
| C | -3.04792800 | 1.21840300  | -1.42692500 |
| C | -2.31585100 | 0.75688300  | -2.60275100 |
| C | -1.42894100 | 3.07313600  | -1.18004500 |
| C | 0.69918800  | 3.52471400  | -0.00051800 |
| C | 1.42893700  | 3.07313700  | -1.18004800 |
| C | -2.32940700 | -0.69947200 | -2.60796400 |
| C | -1.19109200 | -1.40932000 | -3.05486900 |
| C | -0.00000300 | -0.67584200 | -3.48929000 |
| C | -0.76403100 | -2.59372400 | -2.35439400 |
| C | 2.67059700  | -2.29188000 | 0.74441000  |
| C | 0.73065600  | 2.63249700  | -2.30876700 |
| C | 0.72583100  | -3.24300400 | 0.00047200  |
| C | 1.51064300  | -3.00772400 | -1.24103200 |
| C | -0.73066100 | 2.63249700  | -2.30876500 |
| C | 2.61098600  | 2.34812100  | -0.72989400 |
| C | 3.04792500  | 1.21840500  | -1.42693100 |
| C | -1.18147000 | 1.45269200  | -3.03167100 |
| C | -0.00000300 | 0.71888900  | -3.47725100 |
| C | 0.76402800  | -2.59372300 | -2.35439500 |
| C | 1.19108800  | -1.40931900 | -3.05487100 |
| C | 1.18146400  | 1.45269300  | -3.03167300 |
| C | 2.67059700  | -2.29209800 | -0.74374200 |
| C | 3.51043900  | 0.04405900  | -0.69830400 |
| C | 2.31584600  | 0.75688500  | -2.60275500 |
| C | 3.07229000  | -1.14031000 | -1.43940300 |
| C | 2.32940200  | -0.69947100 | -2.60796800 |
| N | 0.00000100  | -1.88388400 | 0.00027000  |

**TS1b**

Sum of electronic and zero-point Energies= -2339.624051  
 Sum of electronic and thermal Energies= -2339.602914  
 Sum of electronic and thermal Enthalpies= -2339.601970  
 Sum of electronic and thermal Free Energies= -2339.668148

|   |             |             |             |
|---|-------------|-------------|-------------|
| C | 2.33256700  | -0.67160100 | -2.56086000 |
| C | 2.31355800  | 0.78853800  | -2.58089700 |
| C | 1.17779700  | 1.47587700  | -3.01162600 |
| C | 0.00000600  | 0.73363300  | -3.43322600 |
| C | -0.00000800 | -0.66260400 | -3.38319700 |
| C | 1.17831400  | -1.38639400 | -2.93559600 |
| C | 3.05834100  | 1.27030200  | -1.42284400 |
| C | 0.72865400  | 2.67265700  | -2.30357400 |
| C | -1.17776900 | 1.47590100  | -3.01162500 |
| C | -1.17834400 | -1.38637000 | -2.93559600 |
| C | 0.77201700  | -2.58499000 | -2.21431400 |
| C | 3.15158400  | -1.09441800 | -1.42728100 |
| C | -2.33258200 | -0.67155400 | -2.56085800 |
| C | -2.31354400 | 0.78858500  | -2.58089600 |
| C | -3.15160800 | -1.09435400 | -1.42727900 |
| C | -3.05831600 | 1.27036400  | -1.42284200 |
| C | 2.61712500  | 2.40182900  | -0.72900900 |
| C | -0.72860200 | 2.67267200  | -2.30357400 |
| C | -3.55277200 | 0.11088100  | -0.69688400 |
| C | -1.42949400 | 3.11944600  | -1.17996900 |
| C | 1.42955700  | 3.11941700  | -1.17997000 |
| C | -0.77207100 | -2.58497600 | -2.21431500 |
| C | 1.72839000  | -3.09020200 | -1.23805000 |
| C | 2.61712600  | 2.40182700  | 0.72901400  |
| C | 2.85525500  | -2.27563900 | -0.75445800 |
| C | 3.55277400  | 0.11080900  | -0.69688600 |
| C | 1.13824900  | -3.51072500 | -0.00000500 |
| C | 2.85525600  | -2.27564100 | 0.75444900  |
| C | 3.55277400  | 0.11080700  | 0.69688300  |
| C | -2.61707700 | 2.40188200  | -0.72900700 |
| C | -1.72845400 | -3.09016800 | -1.23804900 |
| C | 0.69877900  | 3.57161900  | 0.00000500  |
| C | 1.72839300  | -3.09020800 | 1.23804000  |
| C | 3.15158600  | -1.09442200 | 1.42727500  |
| C | 3.05834200  | 1.27029800  | 1.42284500  |
| C | 2.31356000  | 0.78853000  | 2.58089800  |
| C | 1.42955800  | 3.11941300  | 1.17997800  |
| C | -0.69870600 | 3.57163300  | 0.00000600  |
| C | -1.42949300 | 3.11944200  | 1.17997900  |
| C | 2.33256900  | -0.67160900 | 2.56085600  |
| C | 1.17831600  | -1.38640300 | 2.93559100  |
| C | -0.00000600 | -0.66261400 | 3.38319500  |
| C | 0.77201900  | -2.58499800 | 2.21430600  |
| C | -2.85530100 | -2.27558100 | -0.75445700 |
| C | -0.72860000 | 2.67266500  | 2.30358200  |
| C | -1.13832000 | -3.51070300 | -0.00000400 |
| C | -1.72845500 | -3.09017300 | 1.23804100  |
| C | 0.72865600  | 2.67265000  | 2.30358100  |
| C | -2.61707600 | 2.40188000  | 0.72901600  |
| C | -3.05831500 | 1.27036000  | 1.42284700  |
| C | 1.17779900  | 1.47586800  | 3.01163000  |
| C | 0.00000900  | 0.73362300  | 3.43322800  |
| C | -0.77207000 | -2.58498300 | 2.21430700  |
| C | -1.17834200 | -1.38637900 | 2.93559300  |
| C | -1.17776700 | 1.47589200  | 3.01163100  |
| C | -2.85530100 | -2.27558400 | 0.75445100  |
| C | -3.55277200 | 0.11087900  | 0.69688600  |
| C | -2.31354200 | 0.78857700  | 2.58089900  |
| C | -3.15160700 | -1.09435900 | 1.42727700  |
| C | -2.33258100 | -0.67156200 | 2.56085800  |
| N | -0.00002800 | -2.75103700 | -0.00000200 |

**1c**

Sum of electronic and zero-point Energies= -2339.860697  
 Sum of electronic and thermal Energies= -2339.839630  
 Sum of electronic and thermal Enthalpies= -2339.838686  
 Sum of electronic and thermal Free Energies= -2339.904705

|   |             |             |             |
|---|-------------|-------------|-------------|
| C | 0.62964600  | -2.31457900 | 2.60245700  |
| C | -0.82957900 | -2.31411900 | 2.60804000  |
| C | -1.52501400 | -1.18096000 | 3.03715100  |
| C | -0.79019800 | 0.00000000  | 3.48117900  |
| C | 0.60716300  | 0.00000000  | 3.46990000  |
| C | 1.33677100  | -1.18022400 | 3.02172000  |
| C | -1.28604700 | -3.04592100 | 1.42964500  |
| C | -2.70592500 | -0.73027400 | 2.31086000  |
| C | -1.52501400 | 1.18095900  | 3.03715200  |
| C | 1.33677100  | 1.18022300  | 3.02172000  |
| C | 2.52442700  | -0.74068900 | 2.30231600  |
| C | 1.07131800  | -3.04087900 | 1.42716800  |
| C | 0.62964600  | 2.31457800  | 2.60245800  |
| C | -0.82957900 | 2.31411800  | 2.60804100  |
| C | 1.07131900  | 3.04087900  | 1.42716900  |
| C | -1.28604700 | 3.04592100  | 1.42964600  |
| C | -2.41615500 | -2.61165900 | 0.73019700  |
| C | -2.70592500 | 0.73027400  | 2.31086100  |
| C | -0.10804700 | 3.49697200  | 0.69813000  |
| C | -3.14155700 | 1.42908500  | 1.18072800  |
| C | -3.14155700 | -1.42908500 | 1.18072800  |
| C | 2.52442700  | 0.74068800  | 2.30231600  |
| C | 2.96108300  | -1.45966700 | 1.19664900  |
| C | -2.41615100 | -2.61165900 | -0.73021200 |
| C | 2.20007000  | -2.60013500 | 0.72859100  |
| C | -0.10804800 | -3.49697300 | 0.69812900  |
| C | 3.56357400  | -0.79229200 | 0.00001200  |
| C | 2.20007500  | -2.60013500 | -0.72857800 |
| C | -0.10804300 | -3.49697300 | -0.69813000 |
| C | -2.41615500 | 2.61165900  | 0.73019800  |
| C | 2.96108300  | 1.45966700  | 1.19664900  |
| C | -3.59160000 | -0.69866400 | -0.00001100 |
| C | 2.96108900  | -1.45966700 | -1.19663100 |
| C | 1.07132700  | -3.04088000 | -1.42716200 |
| C | -1.28603800 | -3.04592100 | -1.42965300 |
| C | -0.82956300 | -2.31411800 | -2.60804500 |
| C | -3.14155000 | -1.42908500 | -1.18074700 |
| C | -3.59160000 | 0.69866400  | -0.00001000 |
| C | -3.14155000 | 1.42908500  | -1.18074600 |
| C | 0.62966200  | -2.31457800 | -2.60245400 |
| C | 1.33679000  | -1.18022300 | -3.02171100 |
| C | 0.60718400  | 0.00000000  | -3.46989500 |
| C | 2.52444100  | -0.74068900 | -2.30230000 |
| C | 2.20007100  | 2.60013500  | 0.72859200  |
| C | -2.70591100 | 0.73027400  | -2.31087600 |
| C | 3.56357400  | 0.79229200  | 0.00001300  |
| C | 2.96108900  | 1.45966700  | -1.19663000 |
| C | -2.70591100 | -0.73027400 | -2.31087600 |
| C | -2.41615100 | 2.61165900  | -0.73021100 |
| C | -1.28603800 | 3.04592100  | -1.42965200 |
| C | -1.52499500 | -1.18095900 | -3.03716000 |
| C | -0.79017700 | 0.00000100  | -3.48118300 |
| C | 2.52444100  | 0.74068900  | -2.30230000 |
| C | 1.33679000  | 1.18022400  | -3.02171000 |
| C | -1.52499500 | 1.18096000  | -3.03716000 |
| C | 2.20007500  | 2.60013500  | -0.72857800 |
| C | -0.10804300 | 3.49697300  | -0.69812900 |
| C | -0.82956300 | 2.31411900  | -2.60804500 |
| C | 1.07132700  | 3.04088000  | -1.42716100 |
| C | 0.62966200  | 2.31457900  | -2.60245300 |
| N | 4.78100400  | 0.00000000  | -0.00000400 |



**TS1b-3** (in Fig. S2)

Sum of electronic and zero-point Energies= -2339.647968  
 Sum of electronic and thermal Energies= -2339.627119  
 Sum of electronic and thermal Enthalpies= -2339.626175  
 Sum of electronic and thermal Free Energies= -2339.691794

|   |             |             |             |
|---|-------------|-------------|-------------|
| C | -0.50341400 | 3.41037700  | -0.96088900 |
| C | 0.92345800  | 3.41169700  | -0.67226000 |
| C | 1.37235400  | 3.26479400  | 0.64620700  |
| C | 0.40726600  | 3.10510900  | 1.73382400  |
| C | -0.95927400 | 3.11025400  | 1.45937100  |
| C | -1.42847800 | 3.28055100  | 0.08832500  |
| C | 1.60357000  | 2.70512900  | -1.75416800 |
| C | 2.51600300  | 2.41538300  | 0.93743200  |
| C | 0.95728200  | 2.15298600  | 2.69265600  |
| C | -1.84205700 | 2.14301200  | 2.12140100  |
| C | -2.59228600 | 2.44050600  | -0.08283300 |
| C | -0.70978000 | 2.69059800  | -2.20553900 |
| C | -1.31247900 | 1.22557600  | 3.05169200  |
| C | 0.10826900  | 1.23080700  | 3.32774700  |
| C | -1.76895600 | -0.17593800 | 3.05531600  |
| C | 0.54409200  | -0.15101900 | 3.50907600  |
| C | 2.70519000  | 1.89188900  | -1.47284600 |
| C | 2.25609700  | 1.72654400  | 2.20187500  |
| C | -0.61475600 | -1.02242600 | 3.34174400  |
| C | 2.67321200  | 0.40231000  | 2.37474200  |
| C | 3.17138300  | 1.74239600  | -0.09934000 |
| C | -2.86234400 | 1.76498800  | 1.18749900  |
| C | -2.77937200 | 1.75118900  | -1.28072100 |
| C | 2.84659100  | 0.60158400  | -2.13938400 |
| C | -1.82816200 | 1.84453400  | -2.34477800 |
| C | 0.59079000  | 2.25890700  | -2.70428300 |
| C | -3.29767200 | 0.32747100  | -1.22390700 |
| C | -1.70069000 | 0.53924000  | -3.00637600 |
| C | 0.72003600  | 1.01955500  | -3.33447100 |
| C | 1.79764800  | -0.55412500 | 3.04287100  |
| C | -3.27410600 | 0.35862700  | 1.11174000  |
| C | 3.60490600  | 0.36143300  | 0.08168500  |
| C | -2.58994100 | -0.42381100 | -2.40099100 |
| C | -0.44179600 | 0.14510100  | -3.50527800 |
| C | 1.87679300  | 0.17867600  | -3.05444400 |
| C | 1.42978500  | -1.21033200 | -3.05409000 |
| C | 3.40356100  | -0.34269900 | -1.17857500 |
| C | 3.35819200  | -0.29477800 | 1.29283400  |
| C | 2.91370000  | -1.68344000 | 1.29790300  |
| C | 0.00013200  | -1.22142400 | -3.34141800 |
| C | -0.83251400 | -2.15087700 | -2.69707900 |
| C | -0.26872100 | -3.10844000 | -1.74272300 |
| C | -2.13157300 | -1.73750600 | -2.21448000 |
| C | -2.74148600 | -0.62067600 | 2.15645500  |
| C | 2.71917700  | -2.36157800 | 0.08758700  |
| C | -4.32095100 | -0.18358800 | -0.10610700 |
| C | -2.82288300 | -1.71441500 | 0.09755000  |
| C | 2.97083200  | -1.67386800 | -1.17721900 |
| C | 1.95252800  | -1.84653700 | 2.37943300  |
| C | 0.84874400  | -2.68771900 | 2.22264700  |
| C | 1.96583100  | -2.11364100 | -2.13158600 |
| C | 1.09839300  | -3.08074800 | -1.45738200 |
| C | -2.38463500 | -2.49400000 | -0.96671400 |
| C | -1.23219400 | -3.30497400 | -0.65560100 |
| C | 1.57332000  | -3.23821200 | -0.08747500 |
| C | -2.54278700 | -1.90007100 | 1.50274200  |
| C | -0.45710800 | -2.27772300 | 2.72674400  |
| C | 0.64575900  | -3.39691100 | 0.95595200  |
| C | -1.45015800 | -2.74071200 | 1.77416500  |
| C | -0.77321700 | -3.44399100 | 0.67947500  |
| N | -2.64951800 | -0.29575200 | -0.07348500 |

**1c-3** (in Fig. S2)

Sum of electronic and zero-point Energies= -2339.757869  
 Sum of electronic and thermal Energies= -2339.736359  
 Sum of electronic and thermal Enthalpies= -2339.735415  
 Sum of electronic and thermal Free Energies= -2339.802219

|   |             |             |             |
|---|-------------|-------------|-------------|
| C | 0.65306500  | 2.31355500  | -2.60427300 |
| C | -0.80448500 | 2.32410500  | -2.60830800 |
| C | -1.50908400 | 1.19522100  | -3.03644600 |
| C | -0.78444700 | 0.00696100  | -3.47904100 |
| C | 0.61319800  | -0.00472900 | -3.46631600 |
| C | 1.34889600  | 1.17056300  | -3.01890200 |
| C | -1.25439300 | 3.06036400  | -1.42941200 |
| C | -2.69369400 | 0.75565300  | -2.31068900 |
| C | -1.53125700 | -1.16736700 | -3.03660800 |
| C | 1.33275800  | -1.19273900 | -2.01465100 |
| C | 2.52750000  | 0.72358300  | -2.29331100 |
| C | 1.10291100  | 3.03536000  | -1.42892200 |
| C | 0.61129000  | -2.32402700 | -2.60341500 |
| C | -0.84785600 | -2.30820300 | -2.60912100 |
| C | 1.04148700  | -3.05563200 | -1.43153300 |
| C | -1.31257300 | -3.03702700 | -1.43097700 |
| C | -2.38786000 | 2.63470900  | -0.73014000 |
| C | -2.70726700 | -0.70503400 | -2.31036500 |
| C | -0.13997000 | -3.50234200 | -0.69887400 |
| C | -3.15010100 | -1.39954100 | -1.18045500 |
| C | -3.12343000 | 1.45854000  | -1.18066200 |
| C | 2.51403200  | -0.75161100 | -2.28677900 |
| C | 2.96466700  | 1.42217300  | -1.18265400 |
| C | -2.38785500 | 2.63470900  | 0.73015500  |
| C | 2.22295300  | 2.57757600  | -0.72773400 |
| C | -0.07268900 | 3.50280500  | -0.69826100 |
| C | 3.63189100  | 0.76357600  | -0.00001000 |
| C | 2.22295800  | 2.57757600  | 0.72772200  |
| C | -0.07268500 | 3.50280500  | 0.69826300  |
| C | -2.43665300 | -2.58959800 | -0.73037700 |
| C | 2.90246700  | -1.46196800 | -1.16341200 |
| C | -3.58008000 | 0.73251400  | 0.00001000  |
| C | 2.96467300  | 1.42217300  | 1.18263800  |
| C | 1.10291900  | 3.03535900  | 1.42891600  |
| C | -1.25438500 | 3.06036300  | 1.42942000  |
| C | -0.80447000 | 2.32410500  | 2.60831300  |
| C | -3.12342300 | 1.45854000  | 1.18068100  |
| C | -3.59304300 | -0.66494100 | 0.00001000  |
| C | -3.15009500 | -1.39954200 | 1.18047300  |
| C | 0.65308000  | 2.31355400  | 2.60427000  |
| C | 1.34891400  | 1.17056200  | 3.01889500  |
| C | 0.61321800  | -0.00473000 | 3.46631200  |
| C | 2.52751400  | 0.72358200  | 2.29329700  |
| C | 2.16371500  | -2.61279100 | -0.72260100 |
| C | -2.70725400 | -0.70503500 | 2.31038100  |
| C | 2.90247300  | -1.46196800 | 1.16339500  |
| C | -2.69368100 | 0.75565200  | 2.31070400  |
| C | -2.43664800 | -2.58959800 | 0.73039100  |
| C | -1.31256500 | -3.03702800 | 1.43098400  |
| C | -1.50906700 | 1.19522000  | 3.03645600  |
| C | -0.78442700 | 0.00696000  | 3.47904600  |
| C | 2.51404500  | -0.75161200 | 2.28676400  |
| C | 1.33277500  | -1.19274000 | 3.01464300  |
| C | -1.53123900 | -1.16736800 | 3.03661700  |
| C | 2.16371900  | -2.61279200 | 0.72258800  |
| C | -0.13996600 | -3.50234200 | 0.69887400  |
| C | -0.84784100 | -2.30820400 | 2.60912500  |
| C | 1.04149500  | -3.05563300 | 1.43152600  |
| C | 0.61130500  | -2.32402800 | 2.60341000  |
| C | 4.96710500  | 0.00246600  | -0.00001400 |
| N | 3.50353800  | -0.83204000 | -0.00001000 |

**2a**

Sum of electronic and zero-point Energies= -2512.928983  
 Sum of electronic and thermal Energies= -2512.901955  
 Sum of electronic and thermal Enthalpies= -2512.901011  
 Sum of electronic and thermal Free Energies= -2512.980813

|   |             |             |             |
|---|-------------|-------------|-------------|
| C | -0.38379200 | -0.00001300 | 3.42327900  |
| C | -1.08753400 | 1.18043800  | 2.93695400  |
| C | -0.36109000 | 2.31939800  | 2.56379500  |
| C | 1.09463700  | 2.31686200  | 2.64529300  |
| C | 1.76708600  | 1.18197300  | 3.10958300  |
| C | 1.01074300  | -0.00001300 | 3.51411500  |
| C | -2.22978900 | 0.74299100  | 2.15244900  |
| C | -0.74367100 | 3.04236500  | 1.36827500  |
| C | 1.61146800  | 3.04792500  | 1.49133900  |
| C | 2.98230900  | 0.73084900  | 2.44530100  |
| C | 1.76708600  | -1.18199600 | 3.10957400  |
| C | -1.08753400 | -1.18046000 | 2.93694600  |
| C | 3.47720500  | 1.42986100  | 1.33935900  |
| C | 2.77667700  | 2.61275300  | 0.85195600  |
| C | 3.98746900  | 0.69900800  | 0.18383000  |
| C | 2.85265500  | 2.61279100  | -0.60648100 |
| C | -2.60470700 | 1.44114000  | 1.02326200  |
| C | 0.47204200  | 3.49902300  | 0.69996800  |
| C | 3.59973200  | 1.42983400  | -1.01854800 |
| C | 0.54496100  | 3.49982500  | -0.69451700 |
| C | -1.83225400 | 2.58958500  | 0.61062700  |
| C | 2.98230900  | -0.73086800 | 2.44529500  |
| C | 1.09463700  | -2.31688200 | 2.64527600  |
| C | -3.29948500 | 0.81094900  | -0.19823900 |
| C | -0.36109100 | -2.31941800 | 2.56377700  |
| C | -2.22978900 | -0.74300700 | 2.15244300  |
| C | 1.61146700  | -3.04793600 | 1.49131500  |
| C | -0.74367200 | -3.04237500 | 1.36825200  |
| C | -2.60470700 | -1.44114700 | 1.02325100  |
| C | 1.76007200  | 3.04826000  | -1.36325500 |
| C | 3.47720500  | -1.42987100 | 1.33934900  |
| C | -1.75675000 | 2.59236100  | -0.84495800 |
| C | 0.47204100  | -3.49902800 | 0.69994200  |
| C | -1.83225500 | -2.58958900 | 0.61060800  |
| C | -3.29948500 | -0.81094600 | -0.19824500 |
| C | -2.48449700 | -1.44634600 | -1.33661200 |
| C | -2.48449700 | 1.44635700  | -1.33660200 |
| C | -0.59477100 | 3.04331500  | -1.48527000 |
| C | -0.09070200 | 2.31931900  | -2.63443100 |
| C | -1.75675100 | -2.59235400 | -0.84497800 |
| C | -0.59477100 | -3.04330300 | -1.48529200 |
| C | -0.09070200 | -2.31929900 | -2.63444900 |
| C | 0.54496100  | -3.49981900 | -0.69454400 |
| C | 3.98746900  | -0.69900800 | 0.18382500  |
| C | -0.77452000 | 1.18048700  | -3.08126100 |
| C | 2.77667700  | -2.61275900 | 0.85193700  |
| C | 2.85265500  | -2.61278600 | -0.60650100 |
| C | -1.99220100 | 0.74348300  | -2.41915200 |
| C | 1.36579200  | 2.31705500  | -2.56449700 |
| C | 2.08260200  | 1.18204100  | -2.95634000 |
| C | -1.99220100 | -0.74346400 | -2.41915800 |
| C | -0.77452000 | -1.18046300 | -3.08126900 |
| C | 1.76007200  | -3.04824900 | -1.36327800 |
| C | 1.36579100  | -2.31703500 | -2.56451400 |
| C | -0.02411400 | 0.00001400  | -3.49142400 |
| C | 3.59973200  | -1.42982500 | -1.01855800 |
| C | 3.22246700  | 0.73086800  | -2.16995000 |
| C | 1.37214500  | 0.00001300  | -3.43708100 |
| C | 3.22246700  | -0.73085100 | -2.16995500 |
| C | 2.08260200  | -1.18201800 | -2.95634900 |
| N | -5.47018700 | -0.00000100 | 0.36418300  |
| C | -6.92887800 | 0.00000000  | 0.23813100  |
| C | -4.82367100 | 1.15380700  | -0.26401400 |
| C | -4.82367100 | -1.15380400 | -0.26402300 |
| H | -7.33783500 | -0.88620800 | 0.73388200  |
| H | -7.27040800 | 0.00000400  | -0.81479900 |
| H | -7.33783500 | 0.88620300  | 0.73388900  |
| H | -5.05980400 | 2.07828500  | 0.27088400  |
| H | -5.12583500 | 1.27841100  | -1.32258200 |
| H | -5.12583500 | -1.27839900 | -1.32259200 |
| H | -5.05980500 | -2.07828600 | 0.27086700  |
| N | 0.46767000  | -0.00001600 | 0.00111400  |

**2b**

Sum of electronic and zero-point Energies= -2512.896841  
 Sum of electronic and thermal Energies= -2512.871327  
 Sum of electronic and thermal Enthalpies= -2512.870382  
 Sum of electronic and thermal Free Energies= -2512.944862

|   |             |             |             |
|---|-------------|-------------|-------------|
| C | 0.35698100  | -0.00000300 | 3.30106800  |
| C | 1.05428400  | -1.18014700 | 2.81385800  |
| C | 0.30603400  | -2.33810000 | 2.51010300  |
| C | -1.14910300 | -2.32037400 | 2.62530200  |
| C | -1.80410000 | -1.18018700 | 3.09038900  |
| C | -1.02877400 | -0.00000300 | 3.45685800  |
| C | 2.21618300  | -0.79188600 | 2.03628300  |
| C | 0.64700800  | -3.13372200 | 1.35494800  |
| C | -1.70432600 | -3.06634000 | 1.50022700  |
| C | -3.03547700 | -0.73060900 | 2.45828500  |
| C | -1.80410000 | 1.18018100  | 3.09039100  |
| C | 1.05428400  | 1.18014200  | 2.81386000  |
| C | -3.55637200 | -1.43131900 | 1.36455000  |
| C | -2.87376200 | -2.62101500 | 0.87321000  |
| C | -4.07672800 | -0.69846900 | 0.21390200  |
| C | -2.96157600 | -2.62109800 | -0.58485500 |
| C | 2.63965100  | -1.71585900 | 1.03799300  |
| C | -0.59017600 | -3.55613600 | 0.70291400  |
| C | -3.69781000 | -1.43121400 | -0.99086900 |
| C | -0.67450800 | -3.55706900 | -0.68953800 |
| C | 1.77483500  | -2.78949000 | 0.60526400  |
| C | -3.03547700 | 0.73060400  | 2.45828600  |
| C | -1.14910300 | 2.32036900  | 2.62530600  |
| C | 3.38267700  | -1.22333300 | -0.23675000 |
| C | 0.30603400  | 2.33809600  | 2.51010700  |
| C | 2.21618300  | 0.79188300  | 2.03628500  |
| C | -1.70432600 | 3.06633700  | 1.50023200  |
| C | 0.64700800  | 3.13372000  | 1.35495300  |
| C | 2.63965100  | 1.71585700  | 1.03799600  |
| C | -1.87598800 | -3.06697500 | -1.34752900 |
| C | -3.55637200 | 1.43131700  | 1.36455200  |
| C | 1.68561200  | -2.79295700 | -0.87592400 |
| C | -0.59017600 | 3.55613500  | 0.70292000  |
| C | 1.77483500  | 2.78948900  | 0.60526800  |
| C | 3.38267700  | 1.22333300  | -0.23674800 |
| C | 2.49438100  | 1.72375600  | -1.41104600 |
| C | 2.49438100  | -1.72375400 | -1.41104900 |
| C | 0.47534000  | -3.13489600 | -1.48503300 |
| C | -0.00075800 | -2.33876600 | -2.59086900 |
| C | 1.68561200  | 2.79295800  | -0.87591900 |
| C | 0.47534000  | 3.13489800  | -1.48502800 |
| C | -0.00075800 | 2.33877000  | -2.59086500 |
| C | -0.67450800 | 3.55707000  | -0.68953200 |
| C | -4.07672800 | 0.69846900  | 0.21390300  |
| C | 0.70657000  | -1.18093000 | -2.98304300 |
| C | -2.87376200 | 2.62101400  | 0.87321400  |
| C | -2.96157600 | 2.62109900  | -0.58485100 |
| C | 1.95373400  | -0.79522000 | -2.35116900 |
| C | -1.45930300 | -2.32085200 | -2.53098500 |
| C | -2.16474300 | -1.18018800 | -2.91372100 |
| C | 1.95373400  | 0.79522400  | -2.35116800 |
| C | 0.70657000  | 1.18093500  | -2.98304100 |
| C | -1.87598800 | 3.06697700  | -1.34752400 |
| C | -1.45930300 | 2.32085600  | -2.53098100 |
| C | -0.04406700 | 0.00000300  | -3.38162900 |
| C | -3.69781000 | 1.43121600  | -0.99086600 |
| C | -3.31193100 | -0.73061800 | -2.13928600 |
| C | -1.43837200 | 0.00000300  | -3.36967500 |
| C | -3.31193100 | 0.73062200  | -2.13928400 |
| C | -2.16474300 | 1.18019300  | -2.91371900 |
| N | 5.40538800  | 0.00000000  | 0.36259800  |
| C | 6.86857900  | 0.00000000  | 0.47424900  |
| C | 4.91459800  | -1.21484500 | -0.31833500 |
| C | 4.91459800  | 1.21484500  | -0.31833300 |
| H | 7.19029900  | 0.88688300  | 0.102945400 |
| H | 7.37932500  | 0.00000000  | -0.50719400 |
| H | 7.19029900  | -0.88688400 | 1.02945200  |
| H | 5.33216600  | -2.09375100 | 0.18190300  |
| H | 5.23028400  | -1.24776700 | -1.37947000 |
| H | 5.23028400  | 1.24776900  | -1.37946800 |
| H | 5.33216600  | 2.09375000  | 0.18190700  |
| N | 2.74576900  | 0.00000000  | -0.20569400 |



**TS2b**

Sum of electronic and zero-point Energies= -2512.862673  
 Sum of electronic and thermal Energies= -2512.837193  
 Sum of electronic and thermal Enthalpies=-2512.836249  
 Sum of electronic and thermal Free Energies=-2512.910791

|   |             |             |             |
|---|-------------|-------------|-------------|
| C | -3.26631200 | 0.39201700  | 0.00000000  |
| C | -2.75629400 | 1.07229600  | 1.17201000  |
| C | -2.48529500 | 0.32954100  | 2.33177800  |
| C | -2.63491000 | -1.12072700 | 2.32026600  |
| C | -3.11408200 | -1.76968400 | 1.18017100  |
| C | -3.46547100 | -0.99124500 | 0.00000000  |
| C | -1.93643400 | 2.21469200  | 0.77224800  |
| C | -1.32662100 | 0.65686800  | 3.13453800  |
| C | -1.52005700 | -1.69309600 | 3.06912900  |
| C | -2.50237300 | -3.01213300 | 0.73081800  |
| C | -3.11408200 | -1.76968400 | -1.18017100 |
| C | -2.75629400 | 1.07229600  | -1.17201000 |
| C | -1.41629200 | -3.54752700 | 1.43160500  |
| C | -0.91353000 | -2.87280300 | 2.62278200  |
| C | -0.27419000 | -4.08506000 | 0.69884500  |
| C | 0.54305100  | -2.98623500 | 2.62318000  |
| C | -0.95561000 | 2.63620100  | 1.68766700  |
| C | -0.70383800 | -0.59225100 | 3.56405400  |
| C | 0.93644300  | -3.72695500 | 1.43218100  |
| C | 0.68741200  | -0.70386500 | 3.56860400  |
| C | -0.55891700 | 1.76780900  | 2.78923200  |
| C | -2.50237300 | -3.01213300 | -0.73081800 |
| C | -2.63491000 | -1.12072700 | -2.32026600 |
| C | 0.28785500  | 3.43313300  | 1.27426300  |
| C | -2.48529500 | 0.32954100  | -2.33177800 |
| C | -1.93643400 | 2.21469200  | -0.77224800 |
| C | -1.52005700 | -1.69309600 | -3.06912900 |
| C | -1.32662100 | 0.65686800  | -3.13453800 |
| C | -0.95561000 | 2.63620100  | -1.68766700 |
| C | 1.32298000  | -1.91427100 | 3.07157000  |
| C | -1.41629200 | -3.54752700 | -1.43160500 |
| C | 0.91911600  | 1.66281700  | 2.83270600  |
| C | -0.70383800 | -0.59225100 | -3.56405400 |
| C | -0.55891700 | 1.76780900  | -2.78923200 |
| C | 0.28785500  | 3.43313300  | -1.27426300 |
| C | 1.46345300  | 2.48167300  | -1.78298100 |
| C | 1.46345300  | 2.48167300  | 1.78298100  |
| C | 1.50206800  | 0.43417500  | 3.15711300  |
| C | 2.59456500  | -0.05599000 | 2.34780500  |
| C | 0.91911600  | 1.66281700  | -2.83270600 |
| C | 1.50206800  | 0.43417500  | -3.15711300 |
| C | 2.59456500  | -0.05599000 | -2.34780500 |
| C | 0.68741200  | -0.70386500 | -3.56860400 |
| C | -0.27419000 | -4.08506000 | -0.69884500 |
| C | 2.97684900  | 0.64946200  | 1.18492900  |
| C | -0.91353000 | -2.87280300 | -2.62278200 |
| C | 0.54305100  | -2.98623500 | -2.62318000 |
| C | 2.35260200  | 1.90549800  | 0.80589600  |
| C | 2.51069800  | -1.51299800 | 2.32356500  |
| C | 2.87982000  | -2.22102200 | 1.18025400  |
| C | 2.35260200  | 1.90549800  | -0.80589600 |
| C | 2.97684900  | 0.64946200  | -1.18492900 |
| C | 1.32298000  | -1.91427100 | -3.07157000 |
| C | 2.51069800  | -1.51299800 | -2.32356500 |
| C | 3.36085300  | -0.10435900 | 0.00000000  |
| C | 0.93644300  | -3.72695500 | -1.43218100 |
| C | 2.08988200  | -3.35713200 | 0.73048400  |
| C | 3.34102600  | -1.49844500 | 0.00000000  |
| C | 2.08988200  | -3.35713200 | -0.73048400 |
| C | 2.87982000  | -2.22102200 | -1.18025400 |
| N | -0.37584800 | 5.42981300  | 0.00000000  |
| C | -0.67254400 | 6.86831500  | 0.00000000  |
| C | 0.28797700  | 5.00443700  | 1.26419300  |
| C | 0.28797700  | 5.00443700  | -1.26419300 |
| H | -1.26563100 | 7.11584900  | -0.88618300 |
| H | 0.23092200  | 7.50471600  | 0.00000000  |
| H | -1.26563100 | 7.11584900  | 0.88618300  |
| H | -0.27808300 | 5.41749800  | 2.10283400  |
| H | 1.33493400  | 5.34479900  | 1.33702900  |
| H | 1.33493400  | 5.34479900  | -1.33702900 |
| H | -0.27808300 | 5.41749800  | -2.10283400 |
| N | 0.56518900  | 3.11576000  | 0.00000000  |

**2c**

Sum of electronic and zero-point Energies= -2512.883181  
 Sum of electronic and thermal Energies= -2512.857546  
 Sum of electronic and thermal Enthalpies= -2512.856602  
 Sum of electronic and thermal Free Energies= -2512.931412

|   |             |             |             |
|---|-------------|-------------|-------------|
| N | 3.55352400  | 0.00000000  | -1.11493300 |
| C | -0.26360500 | 0.00000000  | -3.37695100 |
| C | 0.50349300  | 1.17775900  | -3.02063200 |
| C | -0.17655200 | 2.34189100  | -2.61753900 |
| C | -1.62813100 | 2.32407500  | -2.47076300 |
| C | -2.35469700 | 1.18084600  | -2.80691100 |
| C | -1.65759800 | 0.00000000  | -3.30119100 |
| C | 1.79563400  | 0.79667200  | -2.46296900 |
| C | 0.37072500  | 3.14631100  | -1.54729400 |
| C | -1.96801000 | 3.07004700  | -1.26224600 |
| C | -3.45221700 | 0.73069500  | -1.96316100 |
| C | -2.35469700 | -1.18084600 | -2.80691100 |
| C | 0.50349300  | -1.17775900 | -3.02063200 |
| C | -3.76297400 | 1.43154100  | -0.79283300 |
| C | -3.00217500 | 2.62212700  | -0.43373000 |
| C | -4.06557000 | 0.69900700  | 0.43281700  |
| C | -2.82288900 | 2.62163700  | 1.01637700  |
| C | 2.41467300  | 1.75170600  | -1.60428200 |
| C | -0.72545200 | 3.56073200  | -0.68112600 |
| C | -3.47659400 | 1.43180100  | 1.54916500  |
| C | -0.54971700 | 3.55258000  | 0.70358500  |
| C | 1.61642000  | 2.80088700  | -1.02207700 |
| C | -3.45221700 | -0.73069500 | -1.96316100 |
| C | -1.62813100 | -2.32407500 | -2.47076300 |
| C | 3.41770400  | 1.23551500  | -0.50561700 |
| C | -0.17655200 | -2.34189100 | -2.61753900 |
| C | 1.79563400  | -0.79667200 | -2.46296900 |
| C | -1.96801000 | -3.07004700 | -1.26224600 |
| C | 0.37072500  | -3.14631100 | -1.54729400 |
| C | 2.41467300  | -1.75170600 | -1.60428200 |
| C | -1.61716900 | 3.06679200  | 1.56997300  |
| C | -3.76297400 | -1.43154100 | -0.79283300 |
| C | 1.78140200  | 2.72651500  | 0.43777000  |
| C | -0.72545200 | -3.56073200 | -0.68112600 |
| C | 1.61642000  | -2.80088700 | -1.02207700 |
| C | 3.41770400  | -1.23551500 | -0.50561700 |
| C | 2.61256800  | -1.57209600 | 0.75496100  |
| C | 2.61256800  | 1.57209600  | 0.75496100  |
| C | 0.72269100  | 3.10624400  | 1.26653300  |
| C | 0.44111600  | 2.32806500  | 2.45164900  |
| C | 1.78140200  | -2.72651500 | 0.43777000  |
| C | 0.72269100  | -3.10624400 | 1.26653300  |
| C | 0.44111600  | -2.32806500 | 2.45164900  |
| C | -0.54971700 | -3.55258000 | 0.70358500  |
| C | -4.06557000 | -0.69900700 | 0.43281700  |
| C | 1.19157800  | 1.17283000  | 2.70443400  |
| C | -3.00217500 | -2.62212700 | -0.43373000 |
| C | -2.82288900 | -2.62163700 | 1.01637700  |
| C | 2.27728000  | 0.75358000  | 1.82370100  |
| C | -1.00139700 | 2.32068100  | 2.66356700  |
| C | -1.63016500 | 1.18155200  | 3.17272800  |
| C | 2.27728000  | -0.75358000 | 1.82370100  |
| C | 1.19157800  | -1.17283000 | 2.70443400  |
| C | -1.61716900 | -3.06679200 | 1.56997300  |
| C | -1.00139700 | -2.32068100 | 2.66356700  |
| C | 0.53576600  | 0.00000000  | 3.25010900  |
| C | -3.47659400 | -1.43180100 | 1.54916500  |
| C | -2.89586900 | 0.73089800  | 2.61165800  |
| C | -0.83920000 | 0.00000000  | 3.49742800  |
| C | -2.89586900 | -0.73089800 | 2.61165800  |
| C | -1.63016500 | -1.18155200 | 3.17272800  |
| N | 5.32682500  | 0.00000000  | 0.44236500  |
| C | 6.70106400  | 0.00000000  | 0.95821700  |
| C | 5.00121500  | 1.31591500  | -0.24222300 |
| C | 5.00121500  | -1.31591500 | -0.24222300 |
| H | 6.85499000  | -0.88529800 | 1.58409600  |
| H | 6.85499000  | 0.88529800  | 1.58409600  |
| H | 5.51581700  | 1.45459400  | -1.20299300 |
| H | 5.28115000  | 2.11302100  | 0.45366100  |
| H | 5.28115000  | -2.11302100 | 0.45366100  |
| H | 5.51581700  | -1.45459400 | -1.20299400 |
| H | 7.47203100  | 0.00000000  | 0.16658200  |

3a

Sum of electronic and zero-point Energies= -2913.096163  
 Sum of electronic and thermal Energies= -2913.060013  
 Sum of electronic and thermal Enthalpies= -2913.059069  
 Sum of electronic and thermal Free Energies= -2913.162485

|   |             |             |             |
|---|-------------|-------------|-------------|
| C | 0.43030400  | 3.03545000  | 1.58814000  |
| C | -0.33366700 | 3.12574600  | 0.34915800  |
| C | 0.33567900  | 3.31102500  | -0.86722800 |
| C | 1.79158800  | 3.40475100  | -0.89608700 |
| C | 2.52041600  | 3.31564800  | 0.29329800  |
| C | 1.82391800  | 3.13227400  | 1.56364700  |
| C | -1.46249900 | 2.21102000  | 0.43893700  |
| C | -0.08926900 | 2.56705500  | -2.03732200 |
| C | 2.26380300  | 2.71464000  | -2.09314000 |
| C | 3.75150300  | 2.53692100  | 0.33899900  |
| C | 2.63212000  | 2.24710800  | 2.39822600  |
| C | -0.22129500 | 2.05749300  | 2.45128500  |
| C | 4.20269000  | 1.87364400  | -0.80658800 |
| C | 3.44306900  | 1.96421400  | -2.04856700 |
| C | 4.73829900  | 0.51984700  | -0.70230300 |
| C | 3.50708700  | 0.66488800  | -2.71205800 |
| C | -1.88784400 | 1.52423300  | -0.69089400 |
| C | 1.09829200  | 2.19693500  | -2.80130300 |
| C | 4.30635200  | -0.22724000 | -1.87957900 |
| C | 1.15908800  | 0.95414100  | -3.43486100 |
| C | -1.16453200 | 1.67638100  | -1.93550600 |
| C | 3.82037600  | 1.87601500  | 1.64026800  |
| C | 2.01030800  | 1.31003500  | 3.22820800  |
| C | -2.43768300 | 0.12895600  | -0.63356900 |
| C | 0.55464600  | 1.21606800  | 3.25904000  |
| C | -1.39010600 | 1.54153400  | 1.75889500  |
| C | 2.55148900  | -0.04208400 | 3.33419800  |
| C | 0.19793000  | -0.18392400 | 3.38090100  |
| C | -1.74795400 | 0.20931600  | 1.90298700  |
| C | 2.38928200  | 0.17096700  | -3.39208000 |
| C | 4.33772300  | 0.58040700  | 1.73950200  |
| C | -1.10255000 | 0.37932900  | -2.59758600 |
| C | 1.42806200  | -0.96777500 | 3.42987000  |
| C | -0.91893800 | -0.67349600 | 2.69302200  |
| C | -2.36141600 | -0.58718700 | 0.79195700  |
| C | -1.65608200 | -1.91257000 | 0.82024700  |
| C | -1.79037300 | -0.59610900 | -1.77654500 |
| C | 0.03516700  | 0.02776400  | -3.33480500 |
| C | 0.56413700  | -1.31779900 | -3.23196500 |
| C | -0.85860000 | -1.97018800 | 2.03034800  |
| C | 0.32046100  | -2.72335600 | 2.08336600  |
| C | 0.78098600  | -3.41266900 | 0.89386700  |
| C | 1.48780500  | -2.20965900 | 2.79454000  |
| C | 4.80411500  | -0.11239100 | 0.54237000  |
| C | -0.06810900 | -2.24276300 | -2.39183700 |
| C | 3.68941300  | -0.39930900 | 2.60418500  |
| C | 3.75289300  | -1.69869700 | 1.94072400  |
| C | -1.25877200 | -1.87095700 | -1.64712300 |
| C | 2.02069400  | -1.23604800 | -3.26648600 |
| C | 2.78655500  | -2.08890400 | -2.46669800 |
| C | -1.19248000 | -2.54025400 | -0.32905000 |
| C | 0.04133500  | -3.31045300 | -0.29051600 |
| C | 2.67520100  | -2.58523700 | 2.03473500  |
| C | 2.23768800  | -3.33069200 | 0.85831800  |
| C | 0.73413100  | -3.13363200 | -1.56170800 |
| C | 4.44084000  | -1.52079400 | 0.66676900  |
| C | 3.95355900  | -1.57543500 | -1.76084600 |
| C | 2.12844200  | -3.06314200 | -1.59967100 |
| C | 4.02241100  | -2.23657000 | -0.45955200 |
| C | 2.89752200  | -3.15800700 | -0.36165200 |
| N | 1.26218600  | -0.00843500 | -0.00129200 |
| C | -3.70504300 | -0.26155700 | 0.12848800  |
| C | -4.52248400 | 0.86375400  | 0.72510800  |
| O | -5.09466000 | 1.60369100  | -0.26957500 |
| C | -5.98833000 | 2.71609100  | 0.14257500  |
| C | -6.46093200 | 3.38892600  | -1.13140200 |
| C | -4.54839800 | -1.40160700 | -0.36692500 |
| O | -5.82682800 | -1.29578500 | 0.10720000  |
| C | -6.78418900 | -2.37254500 | -0.26058000 |
| C | -8.10291200 | -2.02484200 | 0.40167000  |
| O | -4.66597600 | 1.09325600  | 1.92649800  |
| O | -4.16290800 | -2.33597500 | -1.07456000 |
| H | -6.80774400 | 2.28814700  | 0.72762500  |
| H | -5.41645200 | 3.38670500  | 0.79032200  |
| H | -7.12858600 | 4.22232600  | -0.88569900 |
| H | -7.00655000 | 2.68408500  | -1.76583700 |
| H | -5.61373200 | 3.78154700  | -1.70149700 |
| H | -6.85012900 | -2.40531000 | -1.35178900 |
| H | -6.37026300 | -3.32281500 | 0.08830200  |
| H | -7.99056800 | -1.96967200 | 1.48836500  |
| H | -8.47806300 | -1.06165400 | 0.04315600  |
| H | -8.84775500 | -2.79393300 | 0.16869100  |

3c

Sum of electronic and zero-point Energies= -2913.041006  
 Sum of electronic and thermal Energies= -2913.006425  
 Sum of electronic and thermal Enthalpies= -2913.005480  
 Sum of electronic and thermal Free Energies= -2913.103420

|   |             |             |             |
|---|-------------|-------------|-------------|
| C | -0.55145100 | 2.36530200  | -2.44129200 |
| C | 0.18085800  | 2.91517100  | -1.30429700 |
| C | -0.54821800 | 3.46882900  | -0.22132900 |
| C | -2.00636200 | 3.46663500  | -0.24514800 |
| C | -2.69204900 | 2.94478100  | -1.34283700 |
| C | -1.94456400 | 2.39144100  | -2.46815600 |
| C | 1.38526000  | 2.15611000  | -1.08385800 |
| C | -0.13219900 | 3.22834200  | 1.13912700  |
| C | -2.48761700 | 3.19008500  | 1.10531700  |
| C | -3.87956400 | 2.12816600  | -1.14628000 |
| C | -2.69294900 | 1.24992600  | -2.98684900 |
| C | 0.17882800  | 1.21117300  | 2.34601200  |
| C | -4.33159500 | 1.84789400  | 0.14817700  |
| C | -3.61722800 | 2.38791500  | 1.29730800  |
| C | -4.78299700 | 0.50177100  | 0.48636000  |
| C | -3.61772600 | 1.37162900  | 2.34630200  |
| C | 1.84917800  | 2.06989800  | 0.26703900  |
| C | -1.32391300 | 3.02652600  | 1.96294500  |
| C | -4.33220900 | 0.20611800  | 1.84266700  |
| C | -1.32467800 | 2.05646500  | 2.96464400  |
| C | 1.03735100  | 2.49644700  | 1.38253400  |
| C | -3.87973100 | 1.07880400  | -2.16344200 |
| C | -2.00784800 | 0.13614900  | -3.47434400 |
| C | 2.39247600  | 0.73537600  | 0.72038300  |
| C | -0.54999700 | 0.11193700  | -3.47788700 |
| C | 1.38197200  | 1.01329600  | -2.19443500 |
| C | -2.48907200 | -1.20507700 | -3.15524400 |
| C | -0.13362800 | -1.23941900 | -3.19396400 |
| C | 1.84543200  | -0.33070200 | -2.06553900 |
| C | -2.48907300 | 1.20507700  | 3.15524400  |
| C | -4.33220900 | -0.20611800 | -1.84266700 |
| C | 1.03698300  | 1.45926300  | 2.45516200  |
| C | -1.32467700 | -2.05646500 | -2.96464400 |
| C | 1.03698300  | -1.45926300 | -2.45516200 |
| C | 2.39247600  | -0.73537600 | -0.72038300 |
| C | 1.84917800  | -2.06989900 | -0.26703900 |
| C | 1.84543200  | 0.33070200  | 2.06554000  |
| C | -0.13362900 | 1.23941900  | 3.19396400  |
| C | -0.54999800 | -0.11193700 | 3.47788700  |
| C | 1.03735100  | -2.49644700 | -1.38253300 |
| C | -0.13219900 | -3.22834200 | -1.13912700 |
| C | -0.54821800 | -3.46882900 | 0.22132900  |
| C | -1.32391300 | 3.02652600  | -1.96294500 |
| C | -4.78299700 | -0.50177100 | -0.48636100 |
| C | 0.17882800  | -1.21117300 | 2.95601200  |
| C | -3.61772600 | -1.37162900 | -2.34630200 |
| C | -3.61722800 | -2.38791500 | -1.29730900 |
| C | 1.38197100  | -1.01329600 | 2.19443500  |
| C | -2.00784800 | -0.13614900 | 3.47434400  |
| C | -2.69295000 | -1.24992600 | 2.98684900  |
| C | 1.38526000  | -2.15611000 | 1.08385800  |
| C | 0.18085700  | -2.91517100 | 1.30429700  |
| C | -2.48761700 | -3.19008500 | -1.10531800 |
| C | -2.00636200 | -3.46663500 | 0.24514700  |
| C | -0.55145100 | -2.36530300 | 2.44129200  |
| C | -4.33159500 | -1.84789400 | -0.14817700 |
| C | -3.87973100 | -1.07880300 | 2.16344100  |
| C | -1.94456400 | -2.39144100 | 2.46815600  |
| C | -3.87956500 | -2.12816600 | 1.14627900  |
| C | -2.69205000 | -2.94478100 | 1.34283700  |
| N | 1.32091900  | 0.00000000  | 0.00000000  |
| C | 3.54205600  | 0.00000000  | 0.00000000  |
| C | 4.44341200  | 0.86172700  | -0.87813800 |
| O | 5.10890500  | 1.76485500  | -0.10095000 |
| C | 6.04597300  | 2.70095300  | -0.78042600 |
| C | 6.64252700  | 3.57808300  | 0.30234400  |
| C | 4.44341200  | -0.86172700 | 0.87813900  |
| O | 5.10890500  | -1.76485500 | 0.10095000  |
| C | 6.04597300  | -2.70095200 | 0.78042600  |
| C | 6.64252700  | -3.57808300 | -0.30234400 |
| O | 4.58187300  | 0.76112400  | -2.09695800 |
| O | 4.58187400  | -0.76112400 | 2.09695800  |
| H | 6.79489700  | 2.10262800  | -1.30720200 |
| H | 5.47329000  | 3.26733900  | -1.52034300 |
| H | 7.34472300  | 4.29093600  | -0.14414900 |
| H | 7.18190000  | 2.97610200  | 1.03946500  |
| H | 5.86166200  | 4.14103300  | 0.82179700  |
| H | 6.79489800  | -2.10262700 | 1.30720100  |
| H | 5.47329100  | -3.26733900 | 1.52034300  |
| H | 5.86166200  | -4.14103400 | -0.82179700 |
| H | 7.18189900  | -2.97610200 | -1.03946600 |
| H | 7.34472300  | -4.29093600 | 0.14414900  |
